# Supplementary material
Source: PubMed Central journal article supplement (PMC6687064)
Supplement: NIHMS1045012-supplement-SI.pdf [file NIHMS1045012-supplement-SI.pdf]

Supporting Information for:

**SHAPE probing reveals human ribosomal RNAs are largely unfolded in solution**

Catherine A. Giannetti<sup>1</sup>, Steven Busan<sup>1</sup>, Chase A. Weidmann, and Kevin M. Weeks\*  
Department of Chemistry, University of North Carolina, Chapel Hill, NC 27599-3290

\* correspondence, weeks@unc.edu

<sup>1</sup> contributed equally

Two supporting figures, plus supporting datasets.

**A** Geometric Mean of sensitivity and ppv as a function of low SS regions

|       |      | Entropy |       |       |      |      |      |      |     |     |     |     |
|-------|------|---------|-------|-------|------|------|------|------|-----|-----|-----|-----|
|       |      | 0.0001  | 0.001 | 0.005 | 0.01 | 0.02 | 0.04 | 0.08 | 0.1 | 0.2 | 0.5 | 1   |
| SHAPE | 0.13 |         | 83%   | 81%   | 81%  | 81%  | 81%  | 81%  | 81% | 81% | 81% | 81% |
|       | 0.14 | 72%     | 85%   | 82%   | 82%  | 69%  | 69%  | 66%  | 66% | 66% | 66% | 66% |
|       | 0.15 | 68%     | 81%   | 84%   | 84%  | 73%  | 73%  | 71%  | 71% | 69% | 69% | 69% |
|       | 0.2  | 57%     | 66%   | 69%   | 70%  | 72%  | 67%  | 66%  | 62% | 60% | 59% | 59% |
|       | 0.3  | 62%     | 69%   | 69%   | 67%  | 68%  | 69%  | 69%  | 63% | 59% | 56% | 56% |
|       | 0.4  | 60%     | 67%   | 69%   | 67%  | 68%  | 69%  | 67%  | 63% | 53% | 51% | 51% |
|       | 0.5  | 60%     | 67%   | 70%   | 64%  | 65%  | 65%  | 63%  | 60% | 51% | 46% | 46% |
|       | 0.6  | 60%     | 67%   | 70%   | 64%  | 65%  | 66%  | 62%  | 59% | 50% | 45% | 45% |
|       | 0.8  | 60%     | 67%   | 70%   | 64%  | 65%  | 66%  | 62%  | 59% | 50% | 44% | 44% |

**B** Total nucleotide count within lowSS regions

|       |      | Entropy |       |       |      |      |      |      |      |      |      |      |
|-------|------|---------|-------|-------|------|------|------|------|------|------|------|------|
|       |      | 0.0001  | 0.001 | 0.005 | 0.01 | 0.02 | 0.04 | 0.08 | 0.1  | 0.2  | 0.5  | 1    |
| SHAPE | 0.13 |         | 87    | 191   | 191  | 191  | 191  | 191  | 191  | 191  | 191  | 191  |
|       | 0.14 | 57      | 94    | 198   | 198  | 264  | 264  | 291  | 291  | 291  | 291  | 291  |
|       | 0.15 | 83      | 120   | 298   | 298  | 399  | 399  | 426  | 465  | 490  | 490  | 490  |
|       | 0.2  | 227     | 307   | 800   | 968  | 1136 | 1217 | 1241 | 1411 | 1533 | 1599 | 1599 |
|       | 0.3  | 448     | 638   | 1095  | 1345 | 1586 | 1746 | 2181 | 2532 | 3095 | 3442 | 3442 |
|       | 0.4  | 537     | 766   | 1095  | 1345 | 1633 | 1829 | 2361 | 2737 | 3441 | 4086 | 4086 |
|       | 0.5  | 537     | 766   | 1119  | 1542 | 1873 | 2079 | 2577 | 2936 | 3951 | 4739 | 4739 |
|       | 0.6  | 537     | 766   | 1119  | 1542 | 1873 | 2105 | 2584 | 2971 | 4139 | 4906 | 4906 |
|       | 0.8  | 537     | 766   | 1119  | 1542 | 1873 | 2105 | 2584 | 2971 | 4139 | 4920 | 4920 |

**Figure S1. SHAPE and Shannon entropy thresholds for low SHAPE/low Shannon entropy (lowSS) region modeling.** (A) Structure modeling accuracy (geometric mean of sens and ppv) for lowSS region models in human 18S and 28S rRNAs. Percentages are colored from low (red) to high (green). (B) Number of nucleotides in lowSS regions (including both human 18S and 28S rRNAs). Boxes highlight thresholds used in this work.

A

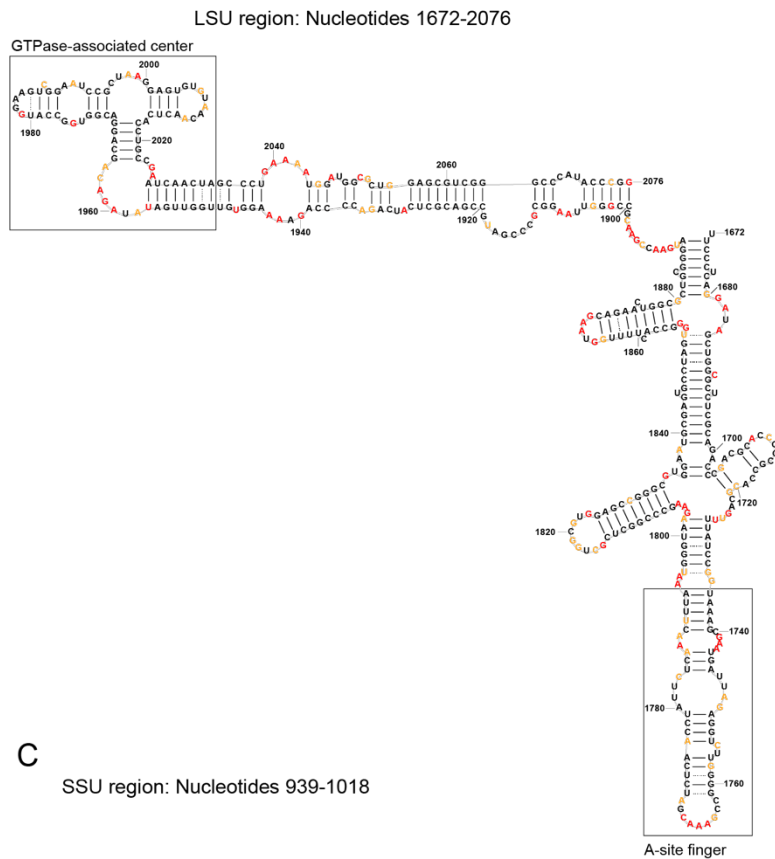

B

LSU region: Nucleotides 3923-4186

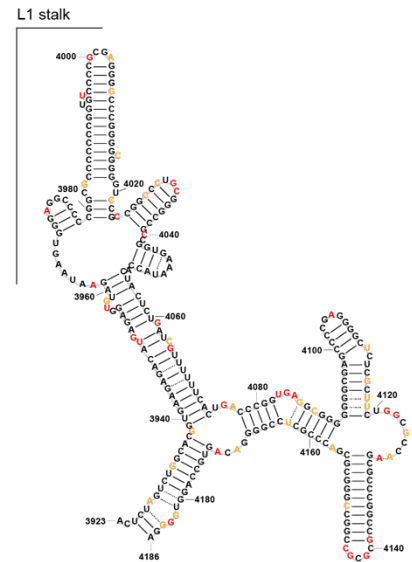

C

SSU region: Nucleotides 939-1018

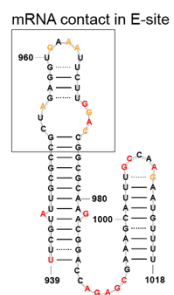

**Figure S2. Models of selected lowSS regions in human rRNAs.** (A) Model of human 28S rRNA region spanning the GTPase-associated center and A-site finger regions. (B) Model of 28S rRNA region containing the L1 stalk. (C) Model of lowSS 18S rRNA region that forms a site of direct mRNA contact.
